# Supplementary material for: Sensorineural hearing loss after neonatal meningitis: a single-centre retrospective study
Source: PubMed Central journal article supplement — BMJ Paediatr Open. 2022 Sep 20;6(1):e001601. doi: 10.1136/bmjpo-2022-001601 (PMC9490614; doi:10.1136/bmjpo-2022-001601), 2022-09-20
Supplement: bmjpo-2022-001601.draft_revisions.pdf [file bmjpo-2022-001601.draft_revisions.pdf]

# BMJ Paediatrics Open

BMJ Paediatrics Open is committed to open peer review. As part of this commitment we make the peer review history of every article we publish publicly available.

When an article is published we post the peer reviewers' comments and the authors' responses online. We also post the versions of the paper that were used during peer review. These are the versions that the peer review comments apply to.

The versions of the paper that follow are the versions that were submitted during the peer review process. They are not the versions of record or the final published versions. They should not be cited or distributed as the published version of this manuscript.

BMJ Paediatrics Open is an open access journal and the full, final, typeset and author-corrected version of record of the manuscript is available on our site with no access controls, subscription charges or pay-per-view fees (<http://bmjpaedsopen.bmj.com>).

If you have any questions on BMJ Paediatrics Open's open peer review process please email [info.bmjpo@bmj.com](mailto:info.bmjpo@bmj.com)

# BMJ Paediatrics Open

## How common is sensorineural hearing loss after neonatal meningitis?

|                               |                                                                                                                                                                                                                                                                                                                                                                                                                                                                                                                                                                                                                                                                                                                                                                                                                                                                                                                                          |
|-------------------------------|------------------------------------------------------------------------------------------------------------------------------------------------------------------------------------------------------------------------------------------------------------------------------------------------------------------------------------------------------------------------------------------------------------------------------------------------------------------------------------------------------------------------------------------------------------------------------------------------------------------------------------------------------------------------------------------------------------------------------------------------------------------------------------------------------------------------------------------------------------------------------------------------------------------------------------------|
| Journal:                      | <i>BMJ Paediatrics Open</i>                                                                                                                                                                                                                                                                                                                                                                                                                                                                                                                                                                                                                                                                                                                                                                                                                                                                                                              |
| Manuscript ID                 | bmjpo-2022-001601                                                                                                                                                                                                                                                                                                                                                                                                                                                                                                                                                                                                                                                                                                                                                                                                                                                                                                                        |
| Article Type:                 | Original research letter                                                                                                                                                                                                                                                                                                                                                                                                                                                                                                                                                                                                                                                                                                                                                                                                                                                                                                                 |
| Date Submitted by the Author: | 05-Jul-2022                                                                                                                                                                                                                                                                                                                                                                                                                                                                                                                                                                                                                                                                                                                                                                                                                                                                                                                              |
| Complete List of Authors:     | Sharma, Ankur; Norfolk and Norwich University Hospitals NHS Foundation Trust, Neonatal Intensive Care Unit<br>Leaf, James; Norfolk and Norwich University Hospitals NHS Foundation Trust, Department of Audiology<br>Thomas, Saumya; Norfolk and Norwich University Hospitals NHS Foundation Trust, Neonatal Intensive Care Unit<br>Cane, Christine; Norfolk and Norwich University Hospitals NHS Foundation Trust, Department of Audiology<br>Stuart, Claire; Norfolk and Norwich University Hospitals NHS Foundation Trust, Microbiology Department<br>Tremlett, Catherine; Norfolk and Norwich University Hospitals NHS Foundation Trust, Microbiology Department<br>Fitzgerald, John; Norfolk and Norwich University Hospitals NHS Foundation Trust, Department of Audiology<br>Clarke, Paul; Norfolk and Norwich University Hospitals NHS Foundation Trust, Neonatal Intensive Care Unit; University of East Anglia, Medical School |
| Keywords:                     | Audiology, Deafness, Neonatology, Microbiology, Epidemiology                                                                                                                                                                                                                                                                                                                                                                                                                                                                                                                                                                                                                                                                                                                                                                                                                                                                             |
|                               |                                                                                                                                                                                                                                                                                                                                                                                                                                                                                                                                                                                                                                                                                                                                                                                                                                                                                                                                          |

SCHOLARONE™  
Manuscripts

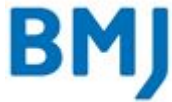

I, the Submitting Author has the right to grant and does grant on behalf of all authors of the Work (as defined in the below author licence), an exclusive licence and/or a non-exclusive licence for contributions from authors who are: i) UK Crown employees; ii) where BMJ has agreed a CC-BY licence shall apply, and/or iii) in accordance with the terms applicable for US Federal Government officers or employees acting as part of their official duties; on a worldwide, perpetual, irrevocable, royalty-free basis to BMJ Publishing Group Ltd ("BMJ") its licensees and where the relevant Journal is co-owned by BMJ to the co-owners of the Journal, to publish the Work in this journal and any other BMJ products and to exploit all rights, as set out in our [licence](#).

The Submitting Author accepts and understands that any supply made under these terms is made by BMJ to the Submitting Author unless you are acting as an employee on behalf of your employer or a postgraduate student of an affiliated institution which is paying any applicable article publishing charge ("APC") for Open Access articles. Where the Submitting Author wishes to make the Work available on an Open Access basis (and intends to pay the relevant APC), the terms of reuse of such Open Access shall be governed by a Creative Commons licence – details of these licences and which [Creative Commons](#) licence will apply to this Work are set out in our licence referred to above.

Other than as permitted in any relevant BMJ Author's Self Archiving Policies, I confirm this Work has not been accepted for publication elsewhere, is not being considered for publication elsewhere and does not duplicate material already published. I confirm all authors consent to publication of this Work and authorise the granting of this licence.

**TITLE:**

How common is sensorineural hearing loss after neonatal meningitis?

**AUTHORS:**

Ankur Sharma <sup>1</sup> MRCPCH

James M Leaf <sup>2</sup> MSc

Saumya Thomas <sup>1</sup> MRCPCH

Christine Cane <sup>2</sup>

Claire Stuart <sup>3</sup>

Catherine Tremlett <sup>3</sup> MD MSc FRCPath

John Fitzgerald <sup>2</sup> PhD BSc CS PFBSA

Paul Clarke <sup>1,4</sup> MD FRCPCH MRCP(UK)

**Affiliations:**

1. Norfolk and Norwich University Hospitals NHS Foundation Trust, Neonatal Intensive Care Unit, Norwich, UK

2. Norfolk and Norwich University Hospitals NHS Foundation Trust, Department of Audiology, Norwich, UK

3. Norfolk and Norwich University Hospitals NHS Foundation Trust, Microbiology Department, Norwich, UK

4. Norwich Medical School, University of East Anglia, Norwich, UK

Correspondence to: Prof P Clarke, ORCID ID: 0000-0001-6203-7632

Consultant Neonatologist, Neonatal Intensive Care Unit, Norfolk and Norwich University

Hospitals NHS Foundation Trust, Norwich NR4 7UY, UK. Email: [paul.clarke@nnuh.nhs.uk](mailto:paul.clarke@nnuh.nhs.uk)

Tel: 01603 286337

**Word count: 592**

**ABSTRACT**

Babies in intensive care are at higher risk for meningitis and sensorineural hearing loss (SNHL). The rate of SNHL associated with neonatal meningitis is unclear. We undertook a retrospective review of admissions to our neonatal intensive care unit over a 16-year period (2006-2021). We identified only 16 definite meningitis cases among 16,070 admissions, an incidence of 0.1%. Diagnostic audiology showed 80% (8/10) surviving infants tested had normal/satisfactory hearing while 20% (2/10) had SNHL: both were extremely preterm and received potentially-ototoxic antimicrobials. Larger studies are needed to clarify whether SNHL occurs mainly due to meningitis itself or its antimicrobial drug treatment.

1  
2  
3 Neonatal meningitis is a well-recognised risk factor for sensorineural hearing loss  
4 (SNHL).[1] Meningitis indicates automatic referral for formal audiological testing at age 8  
5  
6 months in the UK.[2] There are no recent UK data reporting detailed hearing outcomes of  
7  
8 neonates who suffered neonatal meningitis. Our aim was to study the incidence of SNHL in  
9  
10 neonates admitted to our tertiary-level neonatal intensive care unit (NICU) with proven  
11  
12 meningitis.  
13  
14  
15

16  
17 We reviewed electronic neonatal records (BadgerNet, Clevermed, UK) and our local  
18  
19 microbiology database for the 16-year period 1/1/2006 to 31/12/2021 to identify all neonates  
20  
21 diagnosed with unequivocal bacterial or fungal meningitis. We defined proven meningitis  
22  
23 cases as those with positive bacterial or fungal growth on culture of cerebrospinal fluid (CSF)  
24  
25 obtained from infants with clinical signs of suspected meningitis/sepsis and who had received  
26  
27 at least 2 weeks of antibiotic therapy for the episode. We excluded any neonates with  
28  
29 meningitis who were never admitted to our NICU and also those treated for suspected  
30  
31 meningitis despite a negative CSF culture. Babies with CSF isolates of a coagulase-negative  
32  
33 Staphylococcus plus a concomitant CSF leucocyte count  $<20 \times 10^6/L$  were considered false  
34  
35 positive cases and so also excluded.[3] For all confirmed cases we reviewed isolates,  
36  
37 concomitant blood cultures, CSF cell counts, newborn hearing screening results, and later  
38  
39 diagnostic audiological testing at 0.5, 1, 2, and 4 kHz pure tone audiometry thresholds. SNHL  
40  
41 was diagnosed for infants with hearing loss thresholds  $>20$  dB.[4]  
42  
43  
44  
45

46  
47 We had 16,070 neonatal admissions to our NICU during the 16-year study period.  
48  
49 Twenty-eight babies had a culture-positive CSF result and of these 16 were confirmed as  
50  
51 definite meningitis cases (Table). Overall, the definite meningitis rate was 16/16,070 (0.1%),  
52  
53 or 1 case per 1000 admissions. Fifteen were bacterial meningitis cases and one fungal. Three  
54  
55 babies had meningitis caused by a Coagulase-negative Staphylococcus. All except four  
56  
57 babies (cases 8, 9, 12, 16) had concomitant blood cultures positive with the same organism.  
58  
59  
60

1  
2  
3 CSF specimens showed very wide variation in white to red blood cell ratios. The incidence of  
4  
5 meningitis was three-fold higher among preterm compared with term admissions, 12/7,185  
6  
7 (0.17%) vs. 4/8,885 (0.05%),  $p=0.02$ , Chi<sup>2</sup> test). Two infants did not undergo newborn  
8  
9 hearing screening (1 deceased, 1 contraindicated). Of 14 who underwent the screening, 9/14  
10  
11 (64%) had clear responses and 5/14 (36%) required referral (1 bilateral, 4 unilateral screen  
12  
13 fails).  
14  
15

16  
17 Definitive follow-up audiology outcomes were unavailable for six babies (2 died in  
18  
19 infancy before completion of diagnostic testing; 2 had no formal testing despite meningitis  
20  
21 history; 2 failed to attend appointments).  
22  
23

24  
25 Diagnostic audiology outcome data were available for 10/14 (71%) surviving infants:  
26  
27 8/10 (80%) had hearing within normal limits (normal/satisfactory); 2/10 (20%) have SNHL  
28  
29 (1 severe bilateral; 1 moderate mixed bilateral), a rate of SNHL among surviving neonatal  
30  
31 meningitis cases of at least 14% (2/14) (95% confidence limits: 2%, 43%). Both SNHL cases  
32  
33 were infants born extremely preterm at 24 weeks' gestation who suffered meningitis in their  
34  
35 second postnatal week: one had fungal meningitis caused by *Candida albicans*; one had  
36  
37 bacterial meningitis caused by *Staphylococcus epidermidis*. Their antimicrobial treatments  
38  
39 included the potentially-ototoxic agents flucytosine, vancomycin, and rifampicin.  
40  
41

42  
43 Our single centre series covering a 16-year period showed that the incidence of  
44  
45 definite neonatal meningitis among neonatal admissions was very low overall. SNHL caused  
46  
47 by neonatal meningitis (or its treatment) was relatively rare, with only two confirmed cases in  
48  
49 16 years in our NICU. However, for cases of proven meningitis, the associated rate of SNHL  
50  
51 was not insignificant (at least 14%). Larger studies are required to clarify whether SNHL  
52  
53 occurs mainly due to meningitis itself, or to its antimicrobial drug treatment in extremely  
54  
55 preterm neonates.  
56  
57  
58  
59  
60

## Contributorship

PC devised this project. AS, ST and PC collected clinical data, JML, CC, and JF collected audiological data, and CS interrogated the microbiological database. PC and CT reviewed and adjudicated the meningitis cases, and JF provided audiological expertise. PC analysed the data. PC and AS wrote the first manuscript draft and PC wrote the final draft. All authors contributed to manuscript revisions. PC is guarantor.

## Patient and Public Involvement statement

The research question arose as a direct result of a parent's question.

## Funding

The authors declared no specific grant for this research from any funding agency in the public, commercial or not-for-profit sectors.

## Competing interests

The authors have no relevant competing interests to declare.

## Ethics approval

This study reviewed routinely collected clinical data and did not require formal ethics review.

## Exclusive License

I, the Submitting Author has the right to grant and does grant on behalf of all authors of the Work (as defined in the below author licence), an exclusive licence and/or a non-exclusive licence for contributions from authors who are: i) UK Crown employees; ii) where BMJ has



1  
2  
3 agreed a CC-BY licence shall apply, and/or iii) in accordance with the terms applicable for  
4  
5 US Federal Government officers or employees acting as part of their official duties; on a  
6  
7 worldwide, perpetual, irrevocable, royalty-free basis to BMJ Publishing Group Ltd (“BMJ”)  
8  
9  
10 its licensees and where the relevant Journal is co-owned by BMJ to the co-owners of the  
11  
12 Journal, to publish the Work in BMJ Paediatrics Open and any other BMJ products and to  
13  
14 exploit all rights, as set out in our [licence](#).  
15  
16  
17  
18

19 The Submitting Author accepts and understands that any supply made under these terms is  
20  
21 made by BMJ to the Submitting Author unless you are acting as an employee on behalf of  
22  
23 your employer or a postgraduate student of an affiliated institution which is paying any  
24  
25 applicable article publishing charge (“APC”) for Open Access articles. Where the Submitting  
26  
27 Author wishes to make the Work available on an Open Access basis (and intends to pay the  
28  
29 relevant APC), the terms of reuse of such Open Access shall be governed by a Creative  
30  
31 Commons licence – details of these licences and which [Creative Commons](#) licence will apply  
32  
33 to this Work are set out in our licence referred to above.  
34  
35  
36  
37  
38  
39  
40  
41  
42  
43  
44  
45  
46  
47  
48  
49  
50  
51  
52  
53  
54  
55  
56  
57  
58  
59  
60

Table: CSF isolates, microscopy, and hearing outcomes of 16 neonates with definite meningitis

| Case No. | Birth gestation, weeks | Postnatal age, days | CSF isolate                         | CSF cell count, x10 <sup>6</sup> /L |       | CSF ratio WCC:RCC    | Audiological Outcome*                           |
|----------|------------------------|---------------------|-------------------------------------|-------------------------------------|-------|----------------------|-------------------------------------------------|
|          |                        |                     |                                     | WBC (% polymorphs)                  | RBC   |                      |                                                 |
| 1        | 24                     | 8                   | <i>Candida albicans</i>             | 100 (75%)                           | 21600 | 1:216                | Severe bilateral SNHL                           |
| 2        | 24                     | 39                  | Group B Streptococcus               | 840 (90%)                           | 7580  | 1:135                | N/A                                             |
| 3        | 24                     | 8                   | <i>Staphylococcus epidermidis</i>   | 56 (0%)                             | 7540  | 1:135                | Moderate mixed bilateral permanent hearing loss |
| 4        | 24                     | 9                   | <i>Pseudomonas aeruginosa</i>       | 4970 (80%)                          | 850   | 1:0.17               | Satisfactory†                                   |
| 5        | 25                     | 61                  | <i>Escherichia coli</i>             | 7420 (75%)                          | 390   | 1:0.05               | N/A (died, untested)                            |
| 6        | 25                     | 15                  | Coagulase-negative Staphylococcus‡  | 398 (75%)                           | 4580  | 1:12                 | Normal                                          |
| 7        | 27                     | 13                  | <i>Escherichia coli</i>             | 3180 (90%)                          | 360   | 1:0.11               | N/A                                             |
| 8        | 27                     | 25                  | <i>Enterobacter cloacae complex</i> | 18 (5%)                             | 4320  | 1:240                | N/A (died, prior testing attempts unsuccessful) |
| 9        | 28                     | 30                  | <i>Escherichia coli</i>             | 6 (% N/A)                           | 6     | 1:1                  | Satisfactory§                                   |
| 10       | 29                     | 89                  | Group B Streptococcus               | 650 (80%)                           | 2220  | 1:3                  | N/A                                             |
| 11       | 31                     | 40                  | <i>Escherichia coli</i>             | 3210 (95%)                          | 2     | 1:6x10 <sup>-4</sup> | Normal                                          |
| 12       | 36                     | 6                   | <i>Escherichia coli</i>             | 960 (60%)                           | 690   | 1:0.72               | Satisfactory†                                   |
| 13       | 40                     | 8                   | Group B Streptococcus               | 2030 (30%)                          | 11310 | 1:6                  | Satisfactory†                                   |
| 14       | 40                     | 2                   | Group B Streptococcus               | 10 (% N/A)                          | 5500  | 1:550                | Normal                                          |
| 15       | 41                     | 5                   | Group B Streptococcus               | 2850 (40%)                          | 1300  | 1:0.46               | N/A                                             |
| 16       | 41                     | 49                  | <i>Staphylococcus haemolyticus</i>  | 620 (90%)                           | 2830  | 1:5                  | Satisfactory§                                   |

1  
2  
3  
4  
5  
6  
7  
8  
9  
10  
11  
12  
13  
14  
15  
16  
17  
18  
19  
20  
21  
22  
23  
24  
25  
26  
27  
28  
29  
30  
31  
32  
33  
34  
35  
36  
37  
38  
39  
40  
41  
42  
43  
44  
45  
46

CSF, cerebrospinal fluid; WCC, white blood cell count; RCC, red blood cell count; SNHL, sensori-neural hearing loss; N/A, test not available (not done or lost to follow up before determined).

\*Normal hearing  $\leq 20$  dB; mild hearing loss 21-40 dB minimum detectable threshold; moderate 41-70 dB; severe loss 71-95 dB; profound loss  $>95$  dB

†Satisfactory hearing, based on oto-acoustic emissions and visual reinforcement audiometry with sound field testing down to 25 dB (no audiogram), unable to rule out mild loss

‡not further specified;

§Satisfactory hearing based on tone pip auditory brainstem responses/oto-acoustic emissions (no audiogram)

Confidential: For Review Only

## References

1. Stevens JP, Eames M, Kent A, et al. Long term outcome of neonatal meningitis. *Arch Dis Child Fetal Neonatal Ed.* 2003;88:F179-84. doi: 10.1136/fn.88.3.f179.
2. Public Health England. Guidelines for surveillance and audiological referral for infants and children following newborn hearing screen (Updated 19 July 2019) [Internet]. Available from: <https://www.gov.uk/government/publications/surveillance-and-audiological-referral-guidelines/guidelines-for-surveillance-and-audiological-referral-for-infants-and-children-following-newborn-hearing-screen> [Last accessed 2022 Jul 5]
3. Ku LC, Boggess KA, Cohen-Wolkowicz M. Bacterial meningitis in infants. *Clin Perinatol.* 2015;42:29-45, vii-viii. doi: 10.1016/j.clp.2014.10.004.
4. Paludetti G, Conti G, DI Nardo W, et al. Infant hearing loss: from diagnosis to therapy Official Report of XXI Conference of Italian Society of Pediatric Otorhinolaryngology. *Acta Otorhinolaryngol Ital.* 2012;32:347–70.

Review Only

# BMJ Paediatrics Open

## Sensorineural hearing loss after neonatal meningitis: a single centre retrospective study

|                               |                                                                                                                                                                                                                                                                                                                                                                                                                                                                                                                                                                                                                                                                                                                                                                                                                                                                                                                                          |
|-------------------------------|------------------------------------------------------------------------------------------------------------------------------------------------------------------------------------------------------------------------------------------------------------------------------------------------------------------------------------------------------------------------------------------------------------------------------------------------------------------------------------------------------------------------------------------------------------------------------------------------------------------------------------------------------------------------------------------------------------------------------------------------------------------------------------------------------------------------------------------------------------------------------------------------------------------------------------------|
| Journal:                      | <i>BMJ Paediatrics Open</i>                                                                                                                                                                                                                                                                                                                                                                                                                                                                                                                                                                                                                                                                                                                                                                                                                                                                                                              |
| Manuscript ID                 | bmjpo-2022-001601.R1                                                                                                                                                                                                                                                                                                                                                                                                                                                                                                                                                                                                                                                                                                                                                                                                                                                                                                                     |
| Article Type:                 | Original research letter                                                                                                                                                                                                                                                                                                                                                                                                                                                                                                                                                                                                                                                                                                                                                                                                                                                                                                                 |
| Date Submitted by the Author: | 16-Aug-2022                                                                                                                                                                                                                                                                                                                                                                                                                                                                                                                                                                                                                                                                                                                                                                                                                                                                                                                              |
| Complete List of Authors:     | Sharma, Ankur; Norfolk and Norwich University Hospitals NHS Foundation Trust, Neonatal Intensive Care Unit<br>Leaf, James; Norfolk and Norwich University Hospitals NHS Foundation Trust, Department of Audiology<br>Thomas, Saumya; Norfolk and Norwich University Hospitals NHS Foundation Trust, Neonatal Intensive Care Unit<br>Cane, Christine; Norfolk and Norwich University Hospitals NHS Foundation Trust, Department of Audiology<br>Stuart, Claire; Norfolk and Norwich University Hospitals NHS Foundation Trust, Microbiology Department<br>Tremlett, Catherine; Norfolk and Norwich University Hospitals NHS Foundation Trust, Microbiology Department<br>Fitzgerald, John; Norfolk and Norwich University Hospitals NHS Foundation Trust, Department of Audiology<br>Clarke, Paul; Norfolk and Norwich University Hospitals NHS Foundation Trust, Neonatal Intensive Care Unit; University of East Anglia, Medical School |
| Keywords:                     | Audiology, Deafness, Neonatology, Microbiology, Epidemiology                                                                                                                                                                                                                                                                                                                                                                                                                                                                                                                                                                                                                                                                                                                                                                                                                                                                             |
|                               |                                                                                                                                                                                                                                                                                                                                                                                                                                                                                                                                                                                                                                                                                                                                                                                                                                                                                                                                          |

SCHOLARONE™  
Manuscripts



I, the Submitting Author has the right to grant and does grant on behalf of all authors of the Work (as defined in the below author licence), an exclusive licence and/or a non-exclusive licence for contributions from authors who are: i) UK Crown employees; ii) where BMJ has agreed a CC-BY licence shall apply, and/or iii) in accordance with the terms applicable for US Federal Government officers or employees acting as part of their official duties; on a worldwide, perpetual, irrevocable, royalty-free basis to BMJ Publishing Group Ltd ("BMJ") its licensees and where the relevant Journal is co-owned by BMJ to the co-owners of the Journal, to publish the Work in this journal and any other BMJ products and to exploit all rights, as set out in our [licence](#).

The Submitting Author accepts and understands that any supply made under these terms is made by BMJ to the Submitting Author unless you are acting as an employee on behalf of your employer or a postgraduate student of an affiliated institution which is paying any applicable article publishing charge ("APC") for Open Access articles. Where the Submitting Author wishes to make the Work available on an Open Access basis (and intends to pay the relevant APC), the terms of reuse of such Open Access shall be governed by a Creative Commons licence – details of these licences and which [Creative Commons](#) licence will apply to this Work are set out in our licence referred to above.

Other than as permitted in any relevant BMJ Author's Self Archiving Policies, I confirm this Work has not been accepted for publication elsewhere, is not being considered for publication elsewhere and does not duplicate material already published. I confirm all authors consent to publication of this Work and authorise the granting of this licence.

**TITLE:**

Sensorineural hearing loss after neonatal meningitis: a single centre retrospective study

**AUTHORS:**

Ankur Sharma <sup>1</sup> MRCPCH

James M Leaf <sup>2</sup> MSc

Saumya Thomas <sup>1</sup> MRCPCH

Christine Cane <sup>2</sup>

Claire Stuart <sup>3</sup>

Catherine Tremlett <sup>3</sup> MD MSc FRCPath

John Fitzgerald <sup>2</sup> PhD BSc CS PFBSA

Paul Clarke <sup>1,4</sup> MD FRCPCH MRCP(UK)

**Affiliations:**

1. Norfolk and Norwich University Hospitals NHS Foundation Trust, Neonatal Intensive Care Unit, Norwich, UK

2. Norfolk and Norwich University Hospitals NHS Foundation Trust, Department of Audiology, Norwich, UK

3. Norfolk and Norwich University Hospitals NHS Foundation Trust, Microbiology Department, Norwich, UK

4. Norwich Medical School, University of East Anglia, Norwich, UK

Correspondence to: Prof P Clarke, ORCID ID: 0000-0001-6203-7632

Consultant Neonatologist, Neonatal Intensive Care Unit, Norfolk and Norwich University Hospitals NHS Foundation Trust, Norwich NR4 7UY, UK. Email: [paul.clarke@nnuh.nhs.uk](mailto:paul.clarke@nnuh.nhs.uk)

Tel: 01603 286337

**Word count: 633**

**ABSTRACT**

Babies in intensive care are at higher risk for meningitis and sensorineural hearing loss (SNHL). We reviewed the rate of SNHL among definite cases of bacterial/fungal meningitis in our neonatal intensive care unit over a 16-year period (2006-2021). We identified 16 confirmed meningitis cases among 16,070 admissions: 8 of 10 surviving infants with available diagnostic audiology had normal/satisfactory hearing while 2 of 10 had SNHL. Both infants with permanent hearing loss had been born extremely preterm and received potentially-ototoxic antimicrobials. Larger studies are needed to clarify whether SNHL occurs mainly due to meningitis itself or to its antimicrobial drug treatment.



1  
2  
3 Neonatal meningitis is a well-recognised risk factor for sensorineural hearing loss  
4 (SNHL),[1] and indicates automatic referral for early auditory brainstem response testing and  
5 other formal audiological testing.[2] There are no recent UK data reporting detailed hearing  
6 outcomes of neonates who suffered neonatal meningitis. Our aim was to study the incidence  
7 of SNHL in neonates admitted to our tertiary-level neonatal intensive care unit (NICU) with  
8 proven meningitis.  
9

10  
11 We reviewed electronic neonatal records (BadgerNet, Clevermed, UK) and our local  
12 microbiology database for the 16-year period 1/1/2006 to 31/12/2021 to identify all neonates  
13 diagnosed with unequivocal bacterial or fungal meningitis. We defined proven meningitis  
14 cases as those with positive bacterial or fungal growth on culture of cerebrospinal fluid (CSF)  
15 obtained from infants with clinical signs of suspected meningitis/sepsis and who had received  
16 at least 2 weeks of antibiotic therapy for the episode. We excluded any neonates with  
17 meningitis who were never admitted to our NICU, those treated for suspected meningitis  
18 despite a negative CSF culture, and cases of viral meningitis. Babies with CSF isolates of a  
19 coagulase-negative Staphylococcus plus a concomitant CSF leucocyte count  $<20 \times 10^6/L$  were  
20 considered false positive cases and also excluded.[3] For all confirmed cases we reviewed  
21 isolates, concomitant blood cultures, CSF cell counts, newborn hearing screening results, and  
22 later diagnostic audiological testing at 0.5, 1, 2, and 4 kHz pure tone audiometry thresholds.  
23 SNHL was diagnosed for infants with hearing loss thresholds  $>20$  decibels.[4]  
24  
25

26 We had 16,070 neonatal admissions to our NICU during the 16-year study period.  
27  
28 Twenty-eight babies had a culture-positive CSF result and of these 16 were confirmed as  
29 definite meningitis cases (Summary Table). Twelve infants were born preterm (cases 1-12)  
30 and four were born at term (cases 13-16). Overall, the definite meningitis rate was 16/16,070  
31 (0.1%), or 1 case per 1000 admissions. Fifteen were bacterial meningitis cases and one  
32 fungal. Three babies had meningitis caused by a Coagulase-negative Staphylococcus. All  
33  
34  
35  
36  
37  
38  
39  
40  
41  
42  
43  
44  
45  
46  
47  
48  
49  
50  
51  
52  
53  
54  
55  
56  
57  
58  
59  
60

1  
2  
3 except four babies (cases 8, 9, 12, 16) had concomitant blood cultures positive with the same  
4 organism. CSF specimens showed very wide variation in white to red blood cell ratios. The  
5 incidence of meningitis was three-fold higher among preterm compared with term  
6 admissions, 12/7,185 vs. 4/8,885,  $p=0.02$ , Chi<sup>2</sup> test). Two infants did not undergo newborn  
7 hearing screening (1 deceased, 1 contraindicated). Of 14 who underwent the screening, 9 had  
8 clear responses and 5 required referral (1 bilateral, 4 unilateral screen fails).  
9

10  
11  
12  
13  
14  
15  
16  
17 Definitive follow-up audiology outcomes were unavailable for six babies (2 died in  
18 infancy before completion of diagnostic testing; 2 had no formal testing despite meningitis  
19 history; 2 failed to attend appointments).  
20  
21  
22

23  
24 Diagnostic audiology outcome data were available for 10 of the 14 surviving infants:  
25  
26 8 had hearing within normal limits (normal/satisfactory), and 2 have SNHL (1 severe  
27 bilateral; 1 moderate mixed bilateral). Both SNHL cases (cases 1 and 3) were infants born  
28 extremely preterm who had suffered meningitis in their second postnatal week: one had  
29 fungal meningitis caused by *Candida albicans*; one had bacterial meningitis caused by  
30 *Staphylococcus epidermidis*. Their antimicrobial treatments included the potentially-ototoxic  
31 agents flucytosine, vancomycin, and rifampicin.  
32  
33  
34  
35  
36  
37  
38  
39

40  
41 Our single-centre series covering a 16-year period showed that the incidence of  
42 definite neonatal meningitis among neonatal admissions was very low overall. SNHL caused  
43 by neonatal meningitis (or its treatment) was relatively rare, with only two confirmed cases in  
44 16 years in our NICU. However, for cases of proven meningitis, the associated rate of SNHL  
45 was not insignificant. A large epidemiological study, for example one linking meningitis  
46 cases contained in large infection surveillance databases with hearing outcomes as logged in  
47 national audiological databases would provide a more accurate indication of SNHL risk after  
48 neonatal meningitis. Such linking, along with related biochemical antimicrobial therapeutic  
49  
50  
51  
52  
53  
54  
55  
56  
57  
58  
59  
60

1  
2  
3 drug monitoring data, may also help to clarify whether SNHL occurs mainly due to  
4  
5 meningitis itself or to its antimicrobial drug treatment in extremely preterm neonates.  
6  
7  
8  
9

### 10 **Contributorship**

11  
12 PC devised this project. AS, ST and PC collected clinical data, JML, CC, and JF collected  
13  
14 audiological data, and CS interrogated the microbiological database. PC and CT reviewed  
15  
16 and adjudicated the meningitis cases, and JF provided audiological expertise. PC analysed the  
17  
18 data. PC and AS wrote the first manuscript draft and PC wrote the final draft. All authors  
19  
20 contributed to manuscript revisions. PC is guarantor.  
21  
22  
23  
24  
25

### 26 **Patient and Public Involvement statement**

27  
28 The research question arose as a direct result of a parent's question.  
29  
30  
31  
32

### 33 **Funding**

34  
35 The authors declared no specific grant for this research from any funding agency in the  
36  
37 public, commercial or not-for-profit sectors.  
38  
39  
40  
41

### 42 **Competing interests**

43  
44 The authors have no relevant competing interests to declare.  
45  
46  
47  
48

### 49 **Ethics approval**

50  
51 This study reviewed routinely collected clinical data and did not require formal ethics review.  
52  
53  
54  
55

### 56 **Exclusive License**

1  
2  
3 I, the Submitting Author has the right to grant and does grant on behalf of all authors of the  
4 Work (as defined in the below author licence), an exclusive licence and/or a non-exclusive  
5  
6 licence for contributions from authors who are: i) UK Crown employees; ii) where BMJ has  
7  
8 agreed a CC-BY licence shall apply, and/or iii) in accordance with the terms applicable for  
9  
10 US Federal Government officers or employees acting as part of their official duties; on a  
11  
12 worldwide, perpetual, irrevocable, royalty-free basis to BMJ Publishing Group Ltd (“BMJ”)  
13  
14 its licensees and where the relevant Journal is co-owned by BMJ to the co-owners of the  
15  
16 Journal, to publish the Work in BMJ Paediatrics Open and any other BMJ products and to  
17  
18 exploit all rights, as set out in our [licence](#).  
19  
20  
21  
22  
23  
24  
25

26 The Submitting Author accepts and understands that any supply made under these terms is  
27  
28 made by BMJ to the Submitting Author unless you are acting as an employee on behalf of  
29  
30 your employer or a postgraduate student of an affiliated institution which is paying any  
31  
32 applicable article publishing charge (“APC”) for Open Access articles. Where the Submitting  
33  
34 Author wishes to make the Work available on an Open Access basis (and intends to pay the  
35  
36 relevant APC), the terms of reuse of such Open Access shall be governed by a Creative  
37  
38 Commons licence – details of these licences and which [Creative Commons](#) licence will apply  
39  
40 to this Work are set out in our licence referred to above.  
41  
42  
43  
44  
45  
46  
47  
48  
49  
50  
51  
52  
53  
54  
55  
56  
57  
58  
59  
60

Summary Table: CSF isolates, microscopy, and hearing outcomes of 16 neonates with definite meningitis

| Case No. | Postnatal age, days | CSF isolate                         | CSF cell count, x10 <sup>6</sup> /L |       | CSF ratio WCC:RCC    | Audiological Outcome*                           |
|----------|---------------------|-------------------------------------|-------------------------------------|-------|----------------------|-------------------------------------------------|
|          |                     |                                     | WBC (% polymorphs)                  | RBC   |                      |                                                 |
| 1        | 8                   | <i>Candida albicans</i>             | 100 (75%)                           | 21600 | 1:216                | Severe bilateral SNHL                           |
| 2        | 39                  | Group B Streptococcus               | 840 (90%)                           | 7580  | 1:135                | N/A                                             |
| 3        | 8                   | <i>Staphylococcus epidermidis</i>   | 56 (0%)                             | 7540  | 1:135                | Moderate mixed bilateral permanent hearing loss |
| 4        | 9                   | <i>Pseudomonas aeruginosa</i>       | 4970 (80%)                          | 850   | 1:0.17               | Satisfactory†                                   |
| 5        | 61                  | <i>Escherichia coli</i>             | 7420 (75%)                          | 390   | 1:0.05               | N/A (died, untested)                            |
| 6        | 15                  | Coagulase-negative Staphylococcus‡  | 398 (75%)                           | 4580  | 1:12                 | Normal                                          |
| 7        | 13                  | <i>Escherichia coli</i>             | 3180 (90%)                          | 360   | 1:0.11               | N/A                                             |
| 8        | 25                  | <i>Enterobacter cloacae complex</i> | 18 (5%)                             | 4320  | 1:240                | N/A (died, prior testing attempts unsuccessful) |
| 9        | 30                  | <i>Escherichia coli</i>             | 6 (% N/A)                           | 6     | 1:1                  | Satisfactory§                                   |
| 10       | 89                  | Group B Streptococcus               | 650 (80%)                           | 2220  | 1:3                  | N/A                                             |
| 11       | 40                  | <i>Escherichia coli</i>             | 3210 (95%)                          | 2     | 1:6x10 <sup>-4</sup> | Normal                                          |
| 12       | 6                   | <i>Escherichia coli</i>             | 960 (60%)                           | 690   | 1:0.72               | Satisfactory†                                   |
| 13       | 8                   | Group B Streptococcus               | 2030 (30%)                          | 11310 | 1:6                  | Satisfactory†                                   |
| 14       | 2                   | Group B Streptococcus               | 10 (% N/A)                          | 5500  | 1:550                | Normal                                          |
| 15       | 5                   | Group B Streptococcus               | 2850 (40%)                          | 1300  | 1:0.46               | N/A                                             |
| 16       | 49                  | <i>Staphylococcus haemolyticus</i>  | 620 (90%)                           | 2830  | 1:5                  | Satisfactory§                                   |

1  
2  
3 CSF, cerebrospinal fluid; WCC, white blood cell count; RCC, red blood cell count; SNHL, sensori-neural hearing loss; N/A, test not available  
4 (not done or lost to follow up before determined).

5 \*Normal hearing  $\leq 20$  dB; mild hearing loss 21-40 dB minimum detectable threshold; moderate 41-70 dB; severe loss 71-95 dB; profound loss  
6 >95 dB

7 †Satisfactory hearing, based on oto-acoustic emissions and visual reinforcement audiometry with sound field testing down to 25 dB (no  
8 audiogram), unable to rule out mild loss

9 ‡not further specified;

10 §Satisfactory hearing based on tone pip auditory brainstem responses/oto-acoustic emissions (no audiogram)

## References

1. Stevens JP, Eames M, Kent A, et al. Long term outcome of neonatal meningitis. *Arch Dis Child Fetal Neonatal Ed.* 2003;88:F179-84. doi: 10.1136/fn.88.3.f179.
2. Public Health England. Guidelines for surveillance and audiological referral for infants and children following newborn hearing screen (Updated 19 July 2019) [Internet]. Available from: <https://www.gov.uk/government/publications/surveillance-and-audiological-referral-guidelines/guidelines-for-surveillance-and-audiological-referral-for-infants-and-children-following-newborn-hearing-screen> [Last accessed 2022 Aug 16]
3. Ku LC, Boggess KA, Cohen-Wolkowicz M. Bacterial meningitis in infants. *Clin Perinatol.* 2015;42:29-45, vii-viii. doi: 10.1016/j.clp.2014.10.004.
4. Paludetti G, Conti G, DI Nardo W, et al. Infant hearing loss: from diagnosis to therapy Official Report of XXI Conference of Italian Society of Pediatric Otorhinolaryngology. *Acta Otorhinolaryngol Ital.* 2012;32:347–70.

Review Only

# BMJ Paediatrics Open

## Sensorineural hearing loss after neonatal meningitis: a single centre retrospective study

|                               |                                                                                                                                                                                                                                                                                                                                                                                                                                                                                                                                                                                                                                                                                                                                                                                                                                                                                                                                          |
|-------------------------------|------------------------------------------------------------------------------------------------------------------------------------------------------------------------------------------------------------------------------------------------------------------------------------------------------------------------------------------------------------------------------------------------------------------------------------------------------------------------------------------------------------------------------------------------------------------------------------------------------------------------------------------------------------------------------------------------------------------------------------------------------------------------------------------------------------------------------------------------------------------------------------------------------------------------------------------|
| Journal:                      | <i>BMJ Paediatrics Open</i>                                                                                                                                                                                                                                                                                                                                                                                                                                                                                                                                                                                                                                                                                                                                                                                                                                                                                                              |
| Manuscript ID                 | bmjpo-2022-001601.R2                                                                                                                                                                                                                                                                                                                                                                                                                                                                                                                                                                                                                                                                                                                                                                                                                                                                                                                     |
| Article Type:                 | Original research letter                                                                                                                                                                                                                                                                                                                                                                                                                                                                                                                                                                                                                                                                                                                                                                                                                                                                                                                 |
| Date Submitted by the Author: | 25-Aug-2022                                                                                                                                                                                                                                                                                                                                                                                                                                                                                                                                                                                                                                                                                                                                                                                                                                                                                                                              |
| Complete List of Authors:     | Sharma, Ankur; Norfolk and Norwich University Hospitals NHS Foundation Trust, Neonatal Intensive Care Unit<br>Leaf, James; Norfolk and Norwich University Hospitals NHS Foundation Trust, Department of Audiology<br>Thomas, Saumya; Norfolk and Norwich University Hospitals NHS Foundation Trust, Neonatal Intensive Care Unit<br>Cane, Christine; Norfolk and Norwich University Hospitals NHS Foundation Trust, Department of Audiology<br>Stuart, Claire; Norfolk and Norwich University Hospitals NHS Foundation Trust, Microbiology Department<br>Tremlett, Catherine; Norfolk and Norwich University Hospitals NHS Foundation Trust, Microbiology Department<br>Fitzgerald, John; Norfolk and Norwich University Hospitals NHS Foundation Trust, Department of Audiology<br>Clarke, Paul; Norfolk and Norwich University Hospitals NHS Foundation Trust, Neonatal Intensive Care Unit; University of East Anglia, Medical School |
| Keywords:                     | Audiology, Deafness, Neonatology, Microbiology, Epidemiology                                                                                                                                                                                                                                                                                                                                                                                                                                                                                                                                                                                                                                                                                                                                                                                                                                                                             |
|                               |                                                                                                                                                                                                                                                                                                                                                                                                                                                                                                                                                                                                                                                                                                                                                                                                                                                                                                                                          |

SCHOLARONE™  
Manuscripts



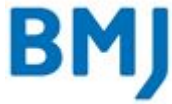

I, the Submitting Author has the right to grant and does grant on behalf of all authors of the Work (as defined in the below author licence), an exclusive licence and/or a non-exclusive licence for contributions from authors who are: i) UK Crown employees; ii) where BMJ has agreed a CC-BY licence shall apply, and/or iii) in accordance with the terms applicable for US Federal Government officers or employees acting as part of their official duties; on a worldwide, perpetual, irrevocable, royalty-free basis to BMJ Publishing Group Ltd ("BMJ") its licensees and where the relevant Journal is co-owned by BMJ to the co-owners of the Journal, to publish the Work in this journal and any other BMJ products and to exploit all rights, as set out in our [licence](#).

The Submitting Author accepts and understands that any supply made under these terms is made by BMJ to the Submitting Author unless you are acting as an employee on behalf of your employer or a postgraduate student of an affiliated institution which is paying any applicable article publishing charge ("APC") for Open Access articles. Where the Submitting Author wishes to make the Work available on an Open Access basis (and intends to pay the relevant APC), the terms of reuse of such Open Access shall be governed by a Creative Commons licence – details of these licences and which [Creative Commons](#) licence will apply to this Work are set out in our licence referred to above.

Other than as permitted in any relevant BMJ Author's Self Archiving Policies, I confirm this Work has not been accepted for publication elsewhere, is not being considered for publication elsewhere and does not duplicate material already published. I confirm all authors consent to publication of this Work and authorise the granting of this licence.

**TITLE:**

Sensorineural hearing loss after neonatal meningitis: a single centre retrospective study

**AUTHORS:**

Ankur Sharma <sup>1</sup> MRCPCH

James M Leaf <sup>2</sup> MSc

Saumya Thomas <sup>1</sup> MRCPCH

Christine Cane <sup>2</sup>

Claire Stuart <sup>3</sup>

Catherine Tremlett <sup>3</sup> MD MSc FRCPath

John Fitzgerald <sup>2</sup> PhD BSc CS PFBSA

Paul Clarke <sup>1,4</sup> MD FRCPCH MRCP(UK)

**Affiliations:**

1. Norfolk and Norwich University Hospitals NHS Foundation Trust, Neonatal Intensive Care Unit, Norwich, UK

2. Norfolk and Norwich University Hospitals NHS Foundation Trust, Department of Audiology, Norwich, UK

3. Norfolk and Norwich University Hospitals NHS Foundation Trust, Microbiology Department, Norwich, UK

4. Norwich Medical School, University of East Anglia, Norwich, UK

Correspondence to: Prof P Clarke, ORCID ID: 0000-0001-6203-7632

Consultant Neonatologist, Neonatal Intensive Care Unit, Norfolk and Norwich University Hospitals NHS Foundation Trust, Norwich NR4 7UY, UK. Email: [paul.clarke@nnuh.nhs.uk](mailto:paul.clarke@nnuh.nhs.uk)

Tel: 01603 286337

**Word count: 644**

**ABSTRACT**

Babies in intensive care are at higher risk for meningitis and sensorineural hearing loss (SNHL). We reviewed the rate of SNHL among definite cases of bacterial/fungal meningitis in our neonatal intensive care unit over a 16-year period (2006-2021). We identified 16 confirmed meningitis cases among 16,070 admissions: 8 of 10 surviving infants with available diagnostic audiology had normal/satisfactory hearing while 2 of 10 had SNHL. Both infants with permanent hearing loss had been born extremely preterm and received potentially-ototoxic antimicrobials. Larger studies are needed to clarify whether SNHL occurs mainly due to meningitis itself or to its antimicrobial drug treatment.

1  
2  
3 Neonatal meningitis is a well-recognised risk factor for sensorineural hearing loss  
4 (SNHL),[1] and indicates automatic referral for early auditory brainstem response testing and  
5 other formal audiological testing.[2] There are no recent UK data reporting detailed hearing  
6 outcomes of neonates who suffered neonatal meningitis. Our aim was to study the incidence  
7 of SNHL in neonates admitted to our tertiary-level neonatal intensive care unit (NICU) with  
8 proven meningitis.  
9

10  
11 We reviewed electronic neonatal records (BadgerNet, Clevermed, UK) and our local  
12 microbiology database for the 16-year period 1/1/2006 to 31/12/2021 to identify all neonates  
13 diagnosed with unequivocal bacterial or fungal meningitis. We defined proven meningitis  
14 cases as those with positive bacterial or fungal growth on culture of cerebrospinal fluid (CSF)  
15 obtained from infants with clinical signs of suspected meningitis/sepsis and who had received  
16 at least 2 weeks of antibiotic therapy for the episode. We excluded any neonates with  
17 meningitis who were never admitted to our NICU, those treated for suspected meningitis  
18 despite a negative CSF culture, and cases of viral meningitis. Babies with CSF isolates of a  
19 coagulase-negative Staphylococcus plus a concomitant CSF leucocyte count  $<20 \times 10^6/L$  were  
20 considered false positive cases and also excluded.[3] For all confirmed cases we reviewed  
21 microbiological isolates, concomitant blood cultures, CSF cell counts, newborn hearing  
22 screening results, and later diagnostic audiological testing at 0.5, 1, 2, and 4 kHz pure tone  
23 audiometry thresholds. SNHL was diagnosed for infants with hearing loss thresholds  $>20$   
24 decibels.[4]  
25

26  
27 We had 16,070 neonatal admissions to our NICU during the 16-year study period.  
28 Twenty-eight babies had a culture-positive CSF result and of these 16 were confirmed as  
29 definite meningitis cases (Table 1). Twelve infants were born preterm and four were born at  
30 term. Overall, the definite meningitis rate was 16/16,070 (0.1%), or 1 case per 1000  
31 admissions. Fifteen were bacterial meningitis cases and one fungal. Three babies had  
32  
33  
34  
35  
36  
37  
38  
39  
40  
41  
42  
43  
44  
45  
46  
47  
48  
49  
50  
51  
52  
53  
54  
55  
56  
57  
58  
59  
60

1  
2  
3 meningitis caused by a Coagulase-negative Staphylococcus. All except four babies had  
4  
5 concomitant blood cultures positive with the same organism. CSF specimens showed very  
6  
7 wide variation in white to red blood cell ratios (Table 1). The incidence of meningitis was  
8  
9 three-fold higher among preterm compared with term admissions, 12/7,185 vs. 4/8,885,  
10  
11  $p=0.02$ , Chi<sup>2</sup> test). Two infants did not undergo newborn hearing screening (1 deceased, 1  
12  
13 contraindicated). Of 14 who underwent the screening, 9 had clear responses and 5 required  
14  
15 referral (1 bilateral, 4 unilateral screen fails).  
16  
17

18  
19 Definitive follow-up audiology outcomes were unavailable for six babies (2 died in  
20  
21 infancy before completion of diagnostic testing; 2 had no formal testing despite meningitis  
22  
23 history; 2 failed to attend appointments).  
24  
25

26  
27 Diagnostic audiology outcome data were available for 10 of the 14 surviving infants:  
28  
29 8 had hearing within normal limits (normal/satisfactory), and 2 have SNHL (1 severe  
30  
31 bilateral; 1 moderate mixed bilateral), a rate of SNHL among surviving neonatal meningitis  
32  
33 cases of at least 14% (2/14) (95% confidence limits: 2%, 43%). Both SNHL cases were  
34  
35 infants born extremely preterm who had suffered meningitis in their second postnatal week:  
36  
37 one had fungal meningitis caused by *Candida albicans*; one had bacterial meningitis caused  
38  
39 by *Staphylococcus epidermidis*. Their antimicrobial treatments included the potentially-  
40  
41 ototoxic agents flucytosine, vancomycin, and rifampicin.  
42  
43

44  
45 Our single-centre series covering a 16-year period showed that the incidence of  
46  
47 definite meningitis among neonatal admissions was very low overall. SNHL caused by  
48  
49 neonatal meningitis (or its treatment) was thus relatively rare, with only two confirmed cases  
50  
51 in 16 years in our NICU. However, among cases of proven meningitis, the associated rate of  
52  
53 SNHL was not insignificant. A large epidemiological study - for example one linking  
54  
55 meningitis cases contained in large infection surveillance databases with hearing outcomes as  
56  
57 logged in national audiological databases - would provide a more accurate indication of  
58  
59  
60

1  
2  
3 SNHL risk after neonatal meningitis. Such linking, along with related biochemical  
4  
5 antimicrobial therapeutic drug monitoring data, may also help to clarify whether SNHL  
6  
7 occurs mainly due to meningitis itself or to its antimicrobial drug treatment in extremely  
8  
9 preterm neonates.  
10  
11  
12  
13

### 14 **Contributorship**

15  
16 PC devised this project. AS, ST and PC collected clinical data, JML, CC, and JF collected  
17  
18 audiological data, and CS interrogated the microbiological database. PC and CT reviewed  
19  
20 and adjudicated the meningitis cases, and JF provided audiological expertise. PC analysed the  
21  
22 data. PC and AS wrote the first manuscript draft and PC wrote the final draft. All authors  
23  
24 contributed to manuscript revisions. PC is guarantor.  
25  
26  
27  
28  
29  
30

### 31 **Patient and Public Involvement statement**

32  
33 The research question arose as a direct result of a parent's question.  
34  
35  
36  
37

### 38 **Funding**

39  
40 The authors declared no specific grant for this research from any funding agency in the  
41  
42 public, commercial or not-for-profit sectors.  
43  
44  
45  
46

### 47 **Competing interests**

48  
49 The authors have no relevant competing interests to declare.  
50  
51  
52  
53

### 54 **Ethics approval**

55  
56 This study reviewed routinely collected clinical data and did not require formal ethics review.  
57  
58  
59  
60

### Exclusive License

I, the Submitting Author has the right to grant and does grant on behalf of all authors of the Work (as defined in the below author licence), an exclusive licence and/or a non-exclusive licence for contributions from authors who are: i) UK Crown employees; ii) where BMJ has agreed a CC-BY licence shall apply, and/or iii) in accordance with the terms applicable for US Federal Government officers or employees acting as part of their official duties; on a worldwide, perpetual, irrevocable, royalty-free basis to BMJ Publishing Group Ltd (“BMJ”) its licensees and where the relevant Journal is co-owned by BMJ to the co-owners of the Journal, to publish the Work in BMJ Paediatrics Open and any other BMJ products and to exploit all rights, as set out in our [licence](#).

The Submitting Author accepts and understands that any supply made under these terms is made by BMJ to the Submitting Author unless you are acting as an employee on behalf of your employer or a postgraduate student of an affiliated institution which is paying any applicable article publishing charge (“APC”) for Open Access articles. Where the Submitting Author wishes to make the Work available on an Open Access basis (and intends to pay the relevant APC), the terms of reuse of such Open Access shall be governed by a Creative Commons licence – details of these licences and which [Creative Commons](#) licence will apply to this Work are set out in our licence referred to above.

Table 1: Summary of baseline characteristics, CSF isolates and microscopy, and hearing outcomes of the 16 neonates with definite meningitis

|                                        |                                                       |
|----------------------------------------|-------------------------------------------------------|
| Birth gestational age, completed weeks | 28 (24 to 41; 25 to 38)                               |
| Birth weight, grammes                  | 935 (589 to 3630; 740 to 2280)                        |
| Postnatal age at diagnosis, days       | 14 (2 to 89; 8 to 40)                                 |
| Isolate, n cases:                      |                                                       |
| <i>Escherichia coli</i>                | 5                                                     |
| Group B Streptococcus                  | 5                                                     |
| Coagulase-negative Staphylococcus      | 3*                                                    |
| <i>Pseudomonas aeruginosa</i>          | 1                                                     |
| <i>Enterobacter cloacae</i> complex    | 1                                                     |
| <i>Candida albicans</i>                | 1                                                     |
| CSF cell counts                        |                                                       |
| WCC, x10 <sup>6</sup> /L               | 745 (6 to 7420; 78 to 3015)                           |
| % polymorphs of total WCC              | 75% (0 to 95%; 40 to 90%)                             |
| RCC, x10 <sup>6</sup> /L               | 2525 (2 to 21600; 540 to 6520)                        |
| CSF ratio WCC:RCC                      | 1:4 (1:550 to 1:6x10 <sup>-4</sup> ; 1:135 to 1:0.32) |
| Hearing outcomes†, n                   |                                                       |
| Sensorineural hearing loss             | 2                                                     |
| Normal                                 | 3                                                     |
| Satisfactory‡                          | 5                                                     |
| N/A                                    | 6                                                     |

Data are median (range; interquartile range).

CSF, cerebrospinal fluid; WCC, white blood cell count; RCC, red blood cell count; N/A, test not available (not done, died, or lost to follow up before determined).

\*1 *Staphylococcus haemolyticus*. 1 *Staphylococcus epidermidis*, 1 not further speciated

†Normal hearing ≤20 dB; mild hearing loss 21-40 dB minimum detectable threshold; moderate 41-70 dB; severe loss 71-95 dB; profound loss >95 dB

‡Satisfactory hearing, based on oto-acoustic emissions and visual reinforcement audiometry with sound field testing down to 25 dB (no audiogram), but unable to rule out mild loss (n=3) or based on tone pip auditory brainstem responses/oto-acoustic emissions (no audiogram) (n=2)



## References

1. Stevens JP, Eames M, Kent A, et al. Long term outcome of neonatal meningitis. *Arch Dis Child Fetal Neonatal Ed.* 2003;88:F179-84. doi: 10.1136/fn.88.3.f179.
2. Public Health England. Guidelines for surveillance and audiological referral for infants and children following newborn hearing screen (Updated 19 July 2019) [Internet]. Available from: <https://www.gov.uk/government/publications/surveillance-and-audiological-referral-guidelines/guidelines-for-surveillance-and-audiological-referral-for-infants-and-children-following-newborn-hearing-screen> [Last accessed 2022 Aug 25]
3. Ku LC, Boggess KA, Cohen-Wolkowicz M. Bacterial meningitis in infants. *Clin Perinatol.* 2015;42:29-45, vii-viii. doi: 10.1016/j.clp.2014.10.004.
4. Paludetti G, Conti G, DI Nardo W, et al. Infant hearing loss: from diagnosis to therapy  
Official Report of XXI Conference of Italian Society of Pediatric Otorhinolaryngology.  
*Acta Otorhinolaryngol Ital.* 2012;32:347–70.
